# Supplementary material
Source: Springer Nature journal article supplement (https://www.springermedizin.de/resource/supplementary/12889_2006_660_MOESM2_ESM.pdf/9502244)

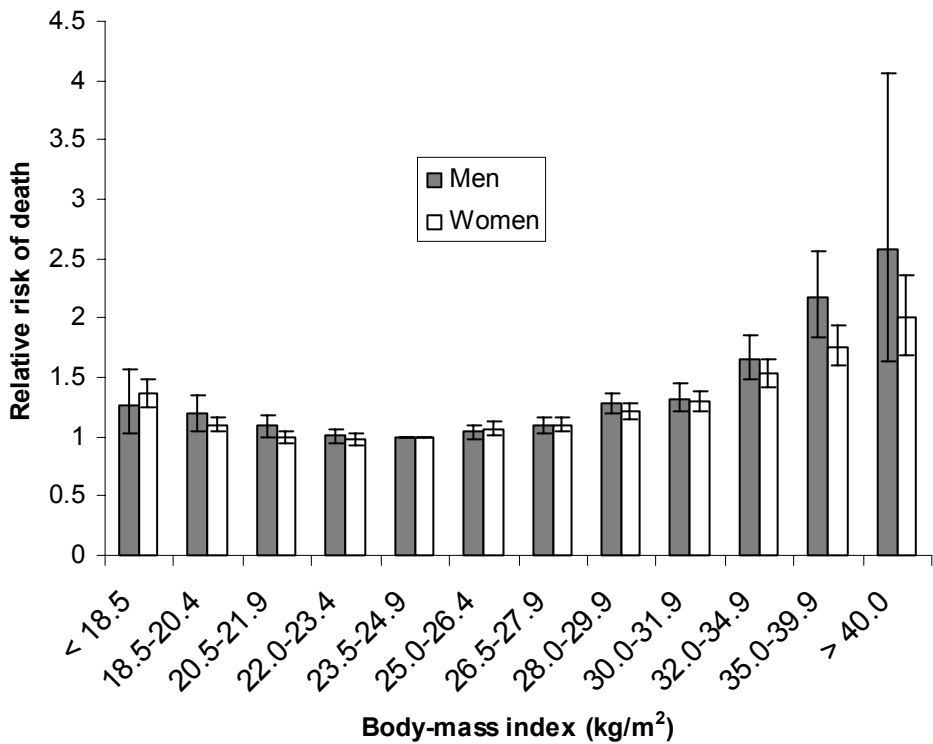

Supplement: MOESM2 [file 9502244]
